# Supplementary material for: The effect of dosing strategies on the therapeutic efficacy of artesunate-amodiaquine for uncomplicated malaria: a meta-analysis of individual patient data
Source: Springer Nature journal article supplement (doi:10.1186/s12916-015-0301-z), 2015-03-31
Supplement: MOESM2 [file 9758754]

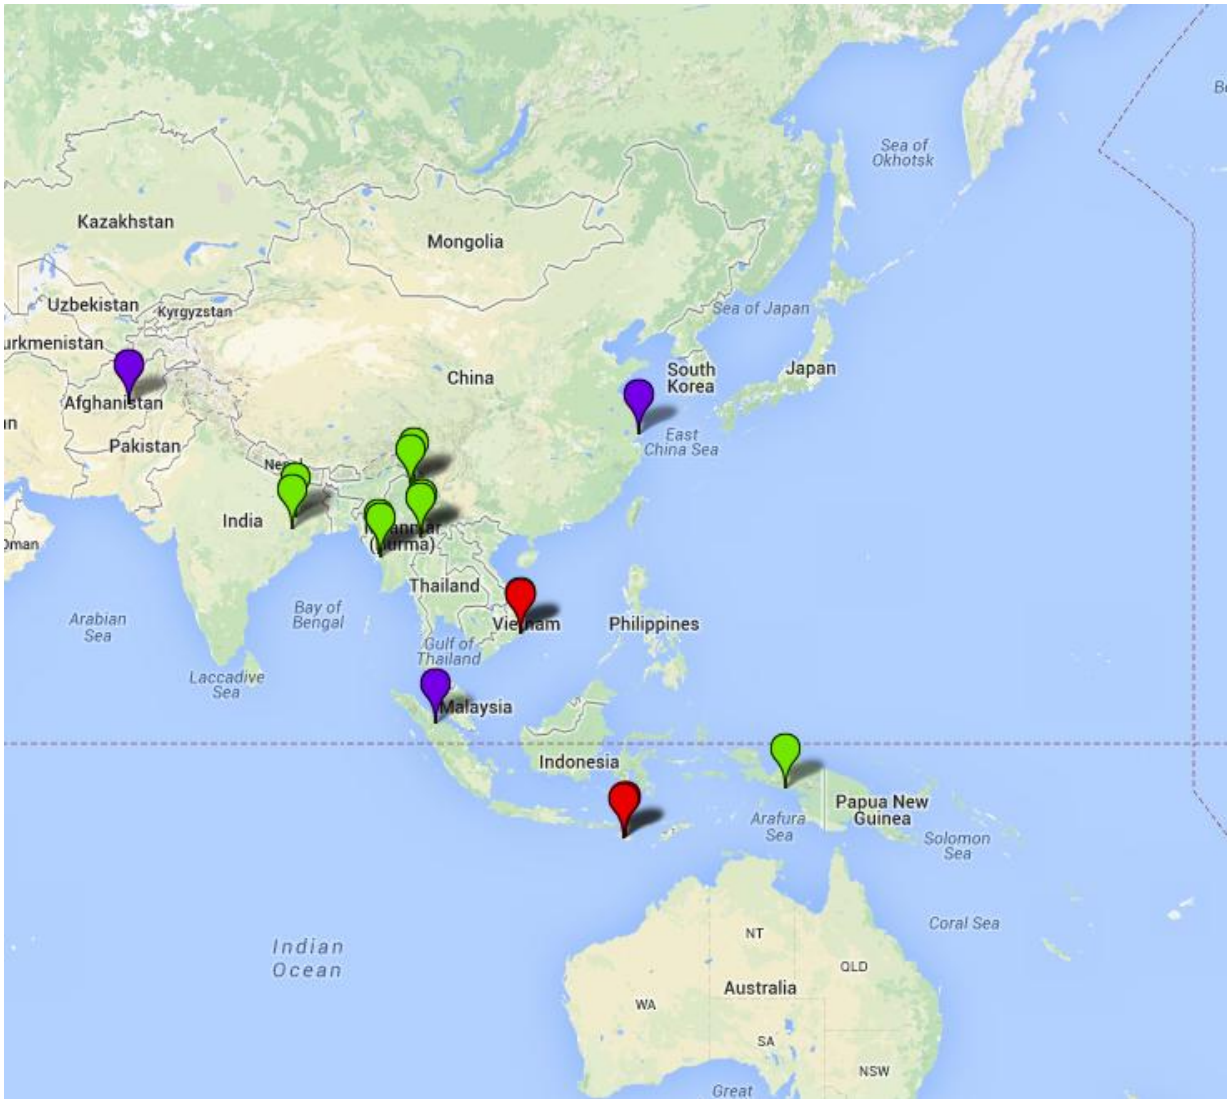

- Studies included in the pooled analysis
- Studies excluded from the pooled analysis
- Studies not available for the pooled analysis
- Studies not targeted for the pooled analysis

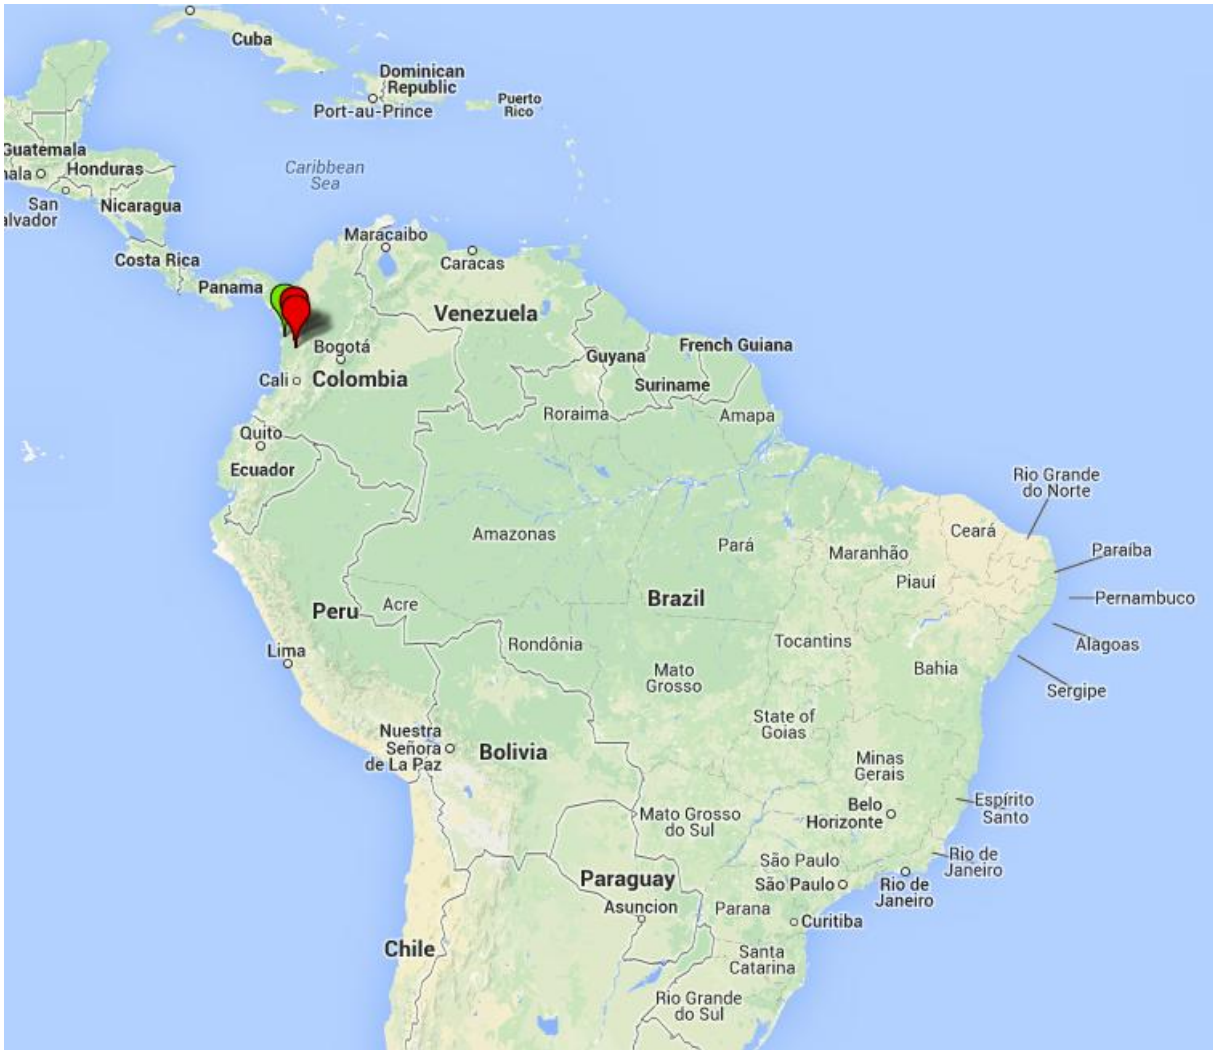

- Studies included in the pooled analysis
- Studies excluded from the pooled analysis
- Studies not available for the pooled analysis
- Studies not targeted for the pooled analysis
